# Supplementary material for: An intronic structure enabled by a long-distance interaction serves as a novel target for splicing correction in spinal muscular atrophy
Source: PubMed Central journal article supplement (PMC3783185; doi:10.1093/nar/gkt609), 2013-07-15
Supplement: supp_gkt609_nar-01372-a-2013-File014.pdf [file supp_gkt609_nar-01372-a-2013-File014.pdf]

SUPPLEMENTARY FIGURES

Figure S1

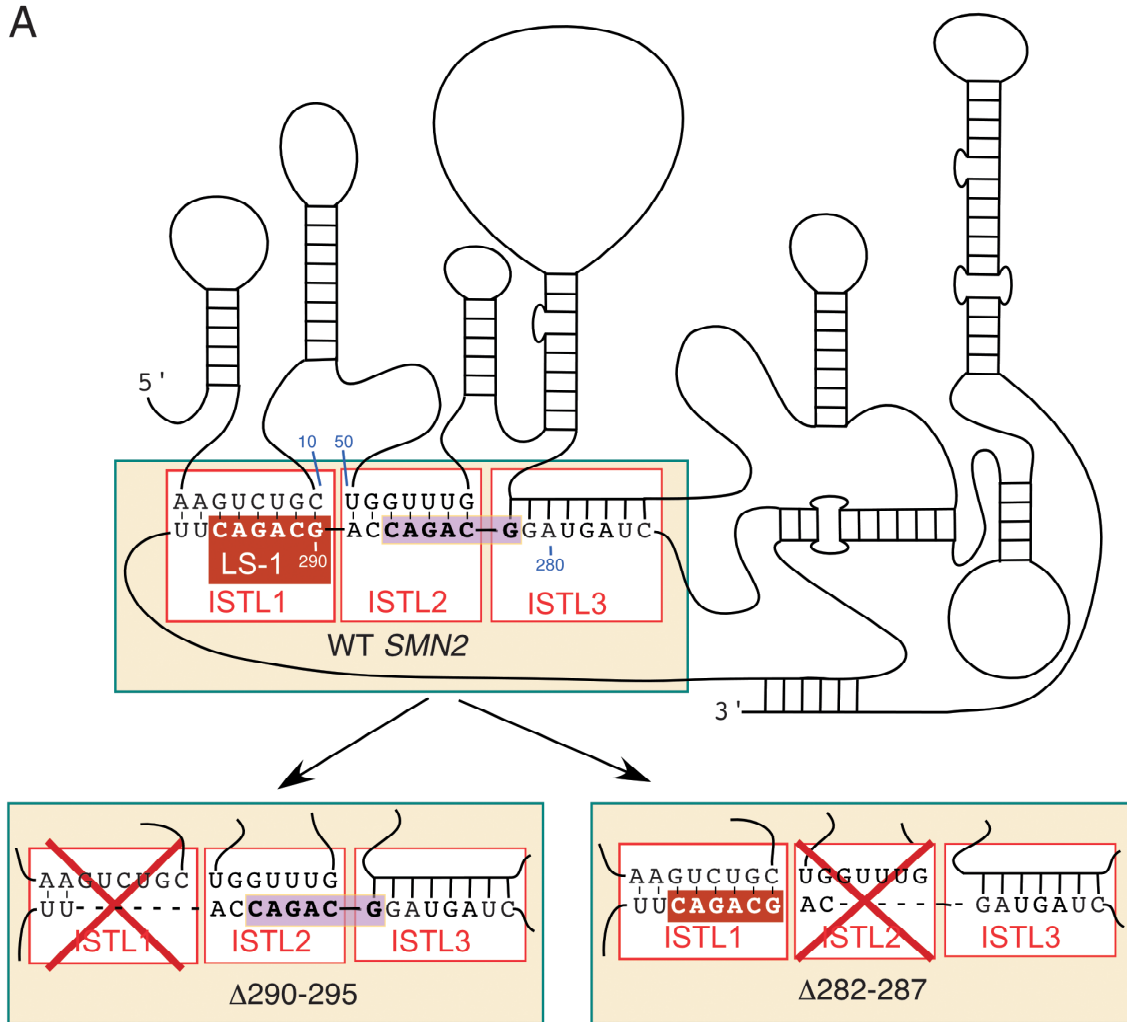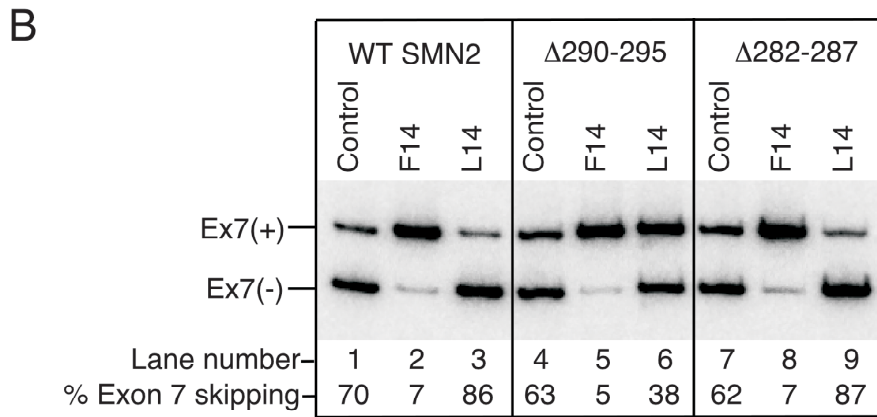

**Figure S2**

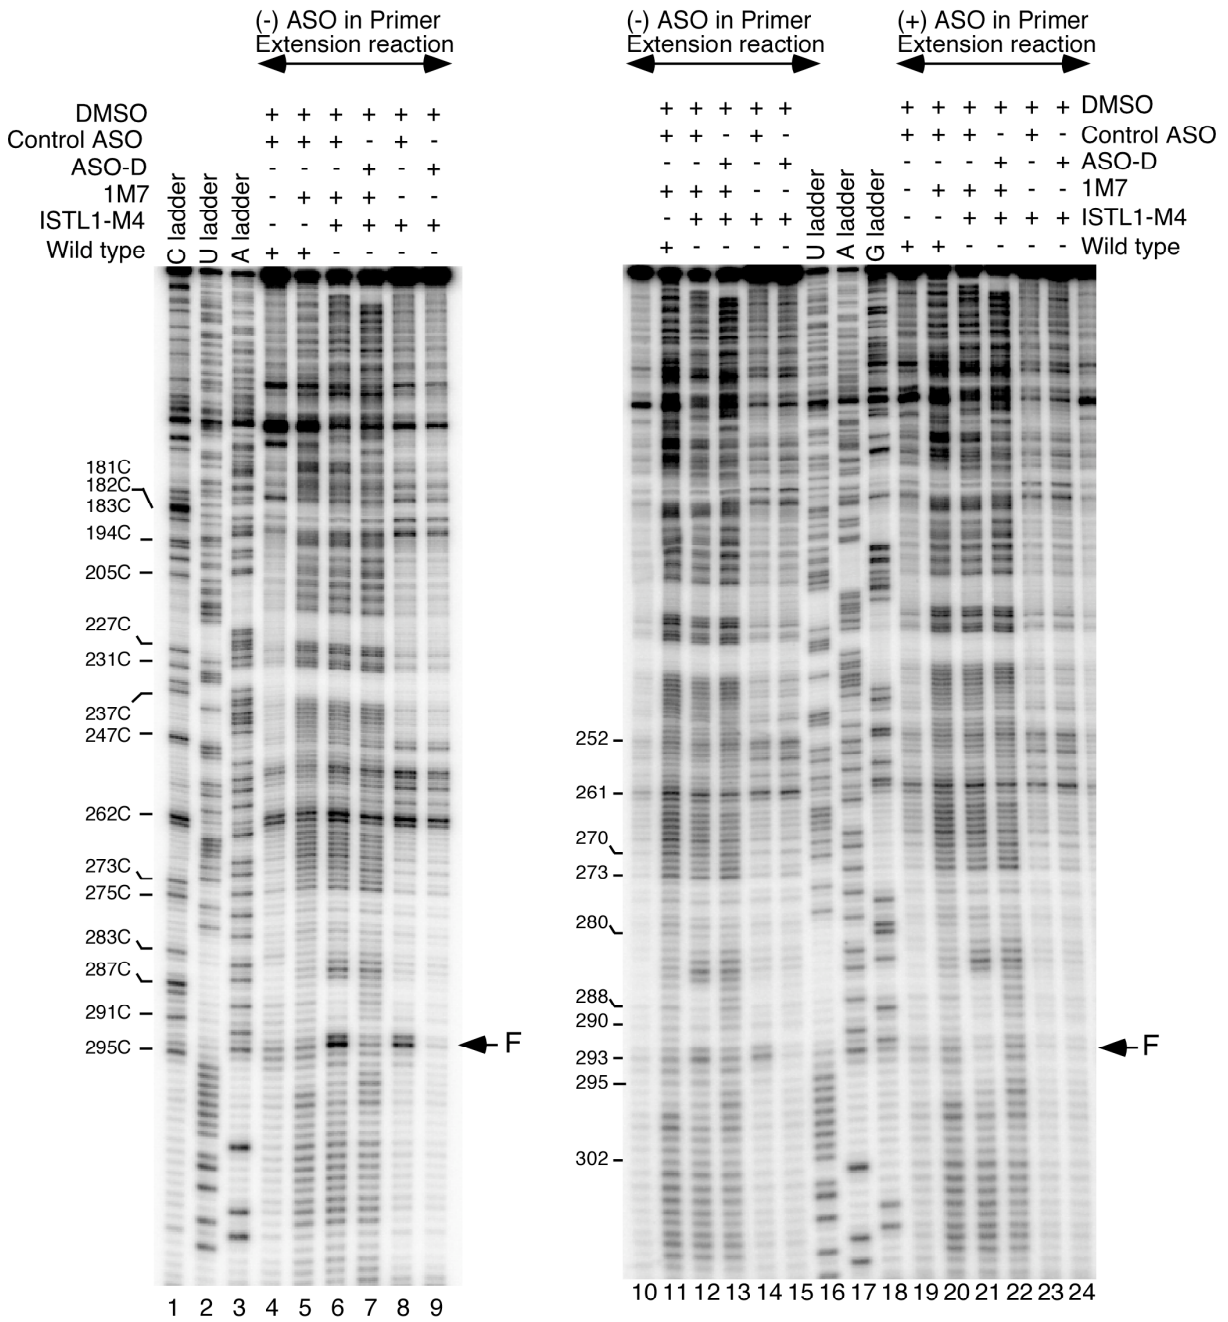

**Figure S3A**

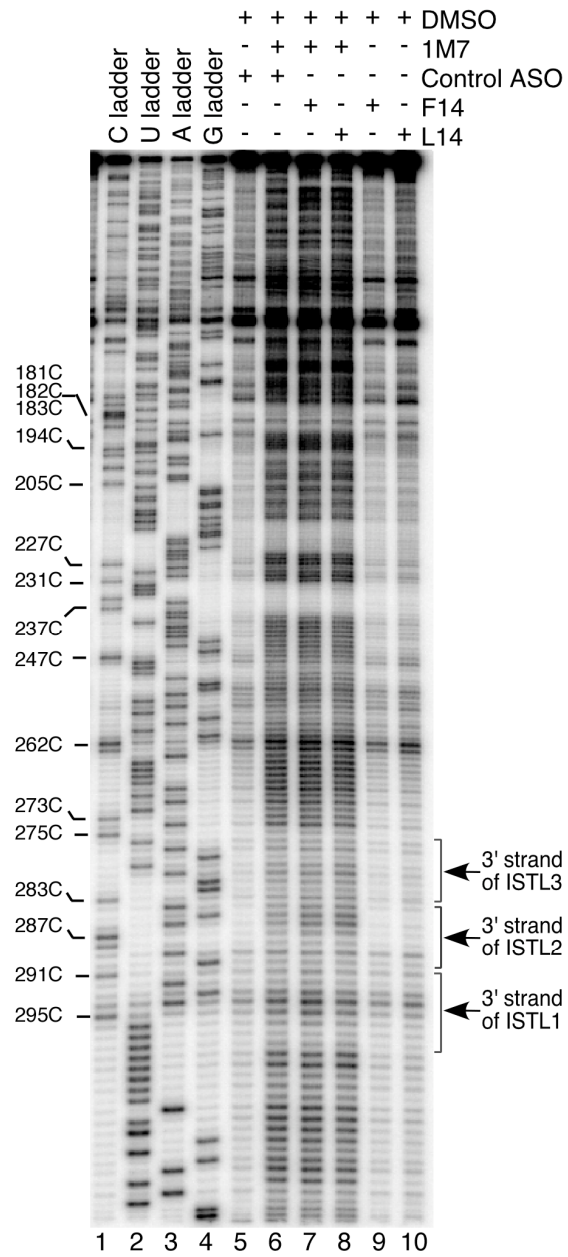

Figure S3B

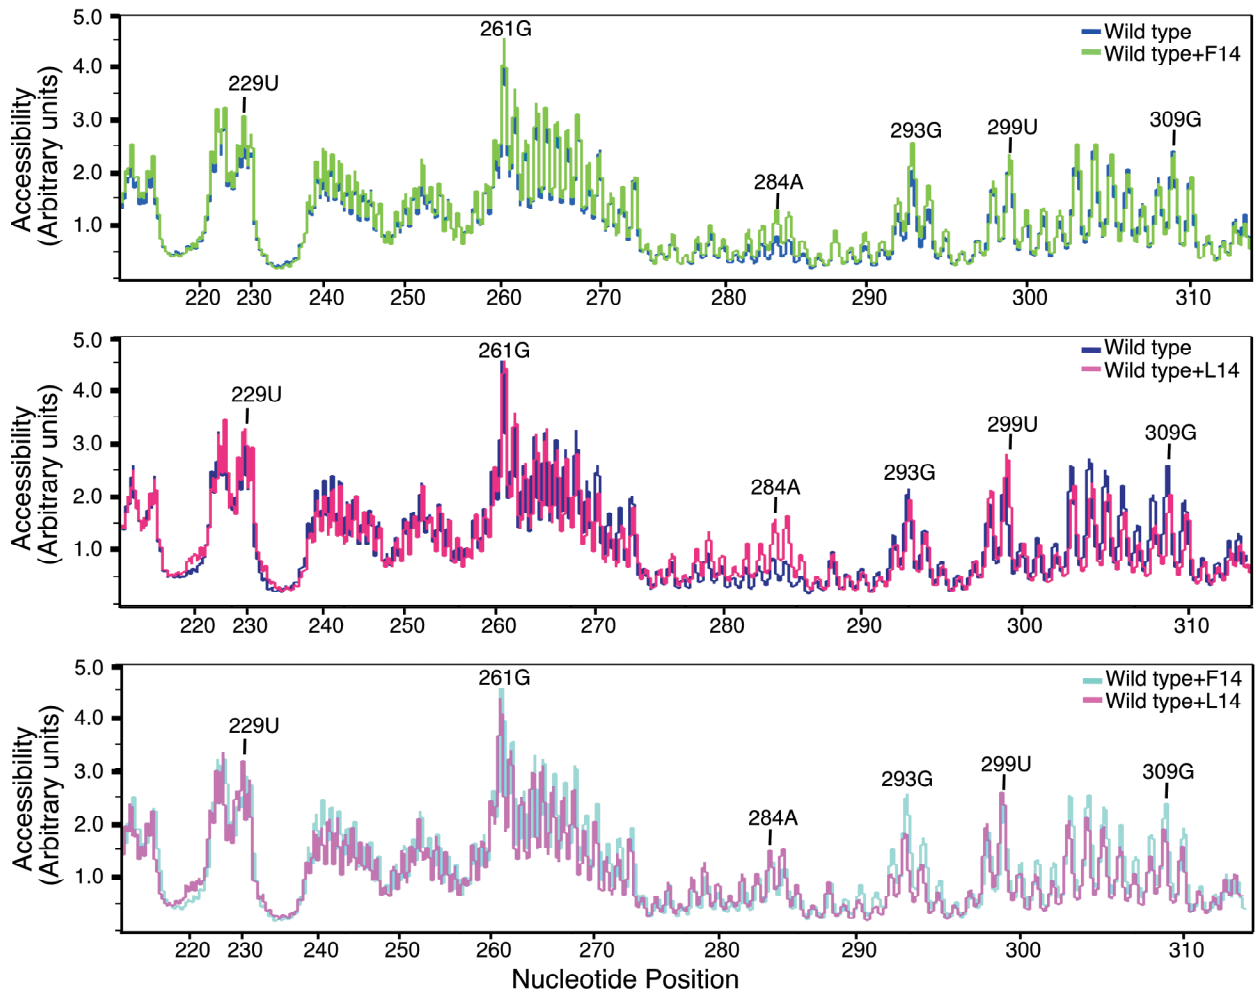

Figure S4

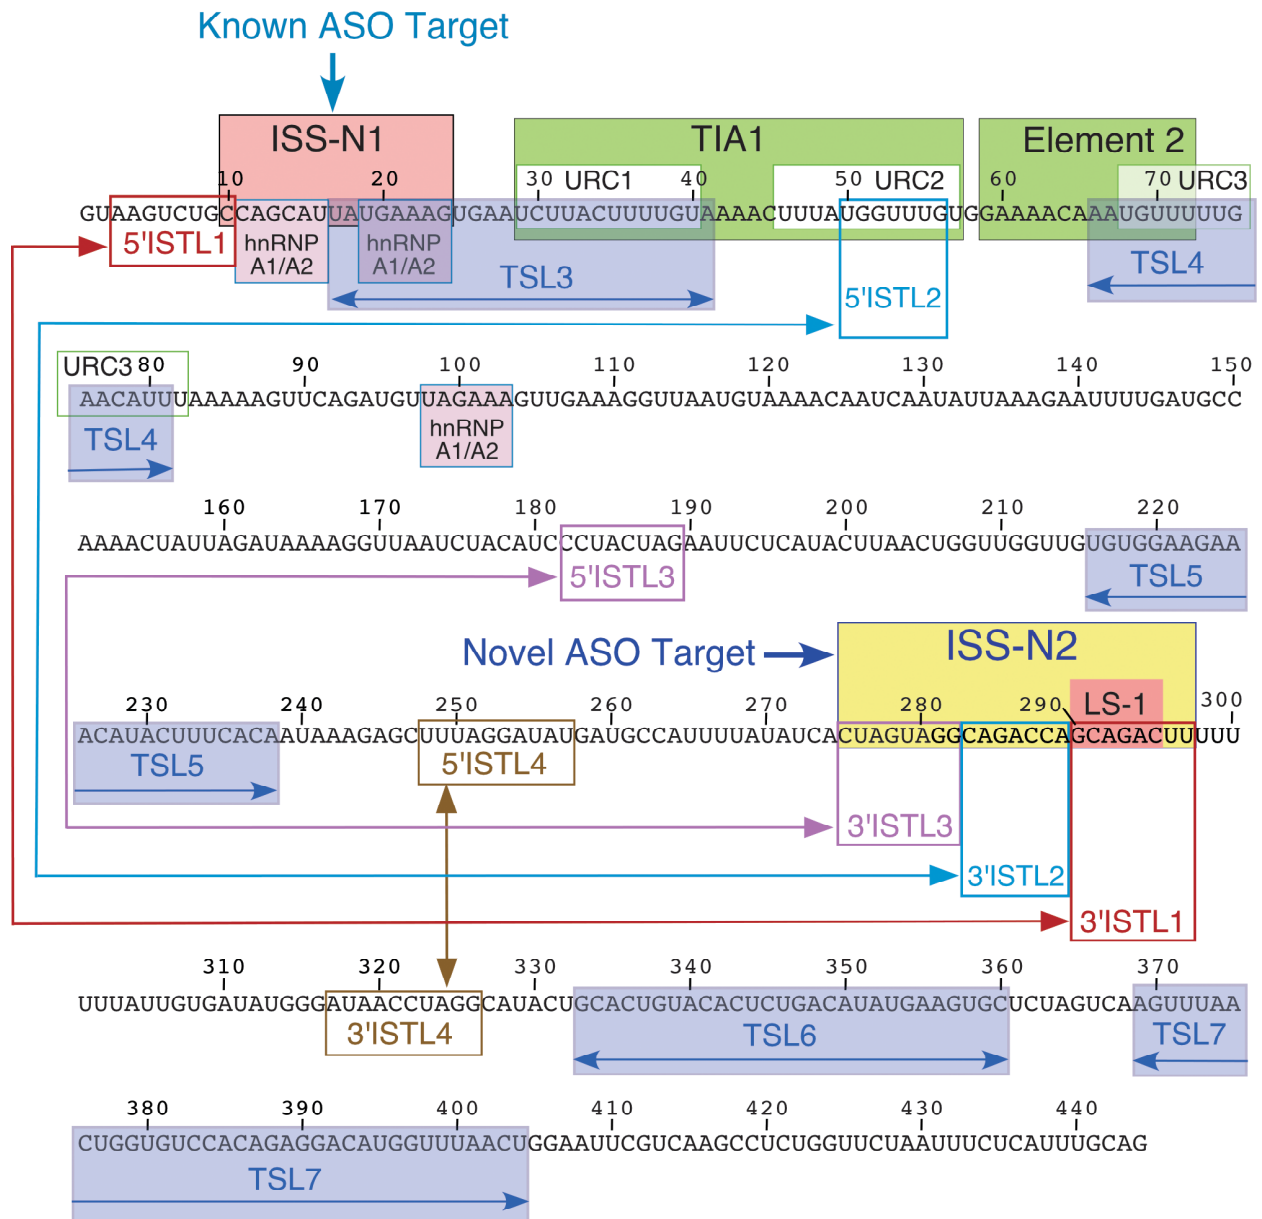

## SUPPLEMENTARY FIGURE LEGENDS

**Figure S1.** Effect of GCAGAC motif deletion on the ability of L14 to promote exon 7 skipping.

(A) Diagrammatic representation of intron 7 structure. Sequence and structural contexts of GCAGAC motifs are highlighted. Numbering of nucleotides starts from the beginning of intron 7. (B) In vivo splicing pattern of the wild type *SMN2* minigene and the deletion mutants shown in panel (A) in the presence of the indicated ASOs. Deletion of GCAGAC motif in the region from position 290 to 295 but not from 282 to 287 abrogated the negative effect of L14 on exon 7 splicing. Exon 7-included (+) and exon 7-skipped (-) spliced products are indicated. Control represents transfection with 10-mer ASO (Supplementary Table S2). Results were analyzed as described Figure 2B. Abbreviation Ex7 stands for exon 7.

**Figure S2.** Strengthening of ISTL1 structure in the mutant is corroborated by falloff products in primer extension reactions. The wild type and ISTL1-M4 mutant RNAs were subjected to 1M7 modification. Modification sites were identified by primer extension using primer#17 (left panel) or primer#315 (right panel). Extension reactions with primer#17 and primer #315 were performed on RNA substrates generated and subjected to 1M7 modification at different times. Primer extension products were separated on denaturing 6% polyacrylamide gels. Presence and absence of ASO-D in primer extension reactions are indicated by (+) and (-), respectively. “Falloff” bands corresponding to positions 292 and 293 in both 1M7 treated and untreated mutant RNA are indicated by arrows (lanes 6 and 8 for primer#17 and lanes 12 and 14 for primer#315). When ASO-D was added to primer extension reaction, these bands disappeared in ISTL1-M4 samples (lanes 21 to 23 for primer#315; also see Figure 8, lanes 6 and 8 for primer#17). Therefore, we attribute 292 and 293 falloff products to a strong RNA structure.

**Figure S3.** Effect of F14 and L14 on RNA secondary structure of the middle portion of intron 7 probed by SHAPE. (A) SHAPE results for the wild type intron 7 in the presence of F14 and L14. RNA substrate refolded in the presence of the control ASO, F14 or L14 was subjected to 1M7 modification. Modification sites were then identified by primer extension using primer#17. Primer extension products were separated on denaturing 6% polyacrylamide gels. Based on the sequencing ladders, positions of residues and locations of structures are marked on the gel. (B)

Alignment of raw peak profiles for the wild type RNA refolded and probed with F14 versus with L14.

**Figure S4.** Relative positioning of the structural and splicing cis-elements on the linear structure of *SMN2* intron 7. Entire *SMN2* intron 7 sequence is shown. Numbering starts from the first position of intron 7. Double arrow within a box represents a TSL, whereas, a double arrow outside of the box in specific color shows the 5' and 3' strands of a particular ISTL. ISS-N2, a novel therapeutic target, is comprised of the 3' strands of ISTL1, ISTL2 and ISTL3. Descriptions of abbreviations are given in the main body of the text as well as in the Supplementary Table S1.

## Supplementary Tables

**Table S1.** Abbreviations used in this study

| Abbreviation         | Full Name                                                                                        | Applicable Figure(s) |
|----------------------|--------------------------------------------------------------------------------------------------|----------------------|
| 1M7                  | 1-methyl-7-nitroisatoic anhydride                                                                | NA                   |
| <sup>10</sup> C      | Cytosine residue at the 10 <sup>th</sup> position of <i>SMN</i> intron 7                         | NA                   |
| A100G                | An adenosine to guanosine substitution at the 100 <sup>th</sup> position of <i>SMN2</i> intron 7 | 1                    |
| ASO                  | Antisense oligonucleotide                                                                        | NA                   |
| C6U                  | A cytosine to uridine substitution at the 6 <sup>th</sup> position of <i>SMN2</i> exon 7         | 1                    |
| Ex                   | Exon                                                                                             | NA                   |
| Exinct               | Extended inhibitory context                                                                      | 1                    |
| GC-rich              | Sequence from the 7 <sup>th</sup> to 14 <sup>th</sup> positions of <i>SMN</i> intron 7           | 1                    |
| hnRNP                | Hetero-nuclear ribonucleoprotein                                                                 | 1,S4                 |
| ISS-N1               | Intronic splicing silencer N1                                                                    | 1, 2,4,S4            |
| ISS-N2               | Intronic splicing silencer N2                                                                    | 1,11,S4              |
| ISTL1                | Internal stem through LDI 1                                                                      | 1,4-9,11,12,S4       |
| ISTL1-M4             | Four substitutions that strengthen ISTL1                                                         | 5,7,8,S2             |
| ISTL2                | Internal stem through LDI 2                                                                      | 1,6,11,12,S4         |
| ISTL3                | Internal stem through LDI 3                                                                      | 1,6,11,12,S4         |
| LDI                  | Long distance interaction                                                                        | 1                    |
| LS-1                 | LDI Site 1                                                                                       | 1,4-6,11,S4          |
| nt                   | Nucleotide                                                                                       | NA                   |
| RTase                | Reverse transcriptase                                                                            |                      |
| SHAPE                | Selective 2'-Hydroxyl Acylation analyzed by Primer Extension                                     | NA                   |
| SMA                  | Spinal muscular atrophy                                                                          | NA                   |
| <i>SMN</i> (Italics) | Survival motor neuron gene or transcript                                                         | NA                   |
| SMN                  | Survival motor neuron protein                                                                    | NA                   |
| TIA1                 | T-cell intracellular antigen-1                                                                   | NA                   |
| TSL2                 | Terminal stem-loop 2                                                                             | 6,12                 |
| TSL3                 | Terminal stem-loop 3                                                                             | 6,S4                 |
| TSL4                 | Terminal stem-loop 4                                                                             | 6,S4                 |
| TSL5                 | Terminal stem-loop 5                                                                             | 6,S4                 |
| TSL6                 | Terminal stem-loop 6                                                                             | 6,S4                 |
| TSL7                 | Terminal stem-loop 7                                                                             | 6,S4                 |
| U1 snRNP             | U1 small nuclear ribonucleoprotein                                                               | 12                   |
| URC1                 | U-rich cluster 1                                                                                 | 1,S4                 |
| URC2                 | U-rich cluster 2                                                                                 | 1,S4                 |
| URC3                 | U-rich cluster 3                                                                                 | 1,S4                 |



**Table S2.** Sequences of antisense oligonucleotides

| No. | Name                          | Sequence (5' to 3')                                                  |
|-----|-------------------------------|----------------------------------------------------------------------|
| 1   | Anti-N1 <sup>#</sup>          | A*mU*mU*mC*mA*mC*mU*mU*mU*mC*mA*mU*mA*mA*mU*mG*mC*mU*mG*mG           |
| 2   | F14 <sup>#</sup>              | mU*mU*mU*mC*mA*mU*mA*mA*mU*mG*mC*mU*mG*mG                            |
| 3   | L14 <sup>#</sup>              | mC*mU*mU*mU*mC*mA*mU*mA*mA*mU*mG*mC*mU*mG                            |
| 4   | Control (10-mer) <sup>#</sup> | mU*mU*mG*mC*mC*mU*mU*mU*mC*mU                                        |
| 5   | ASO 261-278 <sup>#</sup>      | mC*mU*mA*mG*mU*mG*mA*mU*mA*mU*mA*mA*mA*mA*mU*mG*mG*mC                |
| 6   | ASO 271-285 <sup>#</sup>      | mC*mU*mG*mC*mC*mU*mA*mC*mU*mA*mG*mU*mG*mA*mU                         |
| 7   | ASO 276-290 <sup>#</sup>      | mC*mU*mG*mG*mU*mC*mU*mG*mC*mC*mU*mA*mC*mU*mA                         |
| 8   | ASO 281-295 <sup>#</sup>      | mG*mU*mC*mU*mG*mC*mU*mG*mG*mU*mC*mU*mG*mC*mC                         |
| 9   | ASO 283-297 <sup>#</sup>      | mA*mA*mG*mU*mC*mU*mG*mC*mU*mG*mG*mU*mC*mU*mG                         |
| 10  | ASO 286-300 <sup>#</sup>      | mA*mA*mA*mA*mA*mG*mU*mC*mU*mG*mC*mU*mG*mG*mU                         |
| 11  | ASO 290-307 <sup>#</sup>      | mC*mA*mA*mU*mA*mA*mA*mA*mA*mA*mA*mA*mG*mU*mC*mU*mG*mC                |
| 12  | ASO 301-318 <sup>#</sup>      | mA*mU*mC*mC*mC*mA*mU*mA*mU*mC*mA*mC*mA*mA*mU*mA*mA*mA                |
| 13  | ASO-M <sup>#</sup>            | mA*mA*mG*mU*mC*mU*mG*mC*mC*mA*mG*mC*mC*mU*mG*mC*mC*mU*mA*mC*mU*mA*mG |
| 14  | ASO-D <sup>¶</sup>            | ATTCACCTTTCATAATGCTGGCAGACTTAC                                       |

<sup>#</sup> These are RNA ASOs synthesized by Dharmacon/ThermoScientific Molecular Biology. Letter m represents O-methyl modification at the 2<sup>nd</sup> position of a sugar residue and a star (\*) represents phosphorothioate modification of the backbone.

<sup>¶</sup>DNA oligonucleotide

**Table S3.** Sequences of primers used for RT-PCR

| No. | Name | Annealing position | Sequence (5' to 3')              |
|-----|------|--------------------|----------------------------------|
| 1   | N-24 | <i>SMN</i> Exon 6  | CCAGATTCTCTTGATGATGCTGATGCTTTGGG |
| 2   | P1   | Vector-specific    | CGACTCACTATAGGCTAGCC             |
| 3   | P2   | <i>SMN</i> Exon 8  | GCATGCAAGCTTCCTTTTTCTTTCCCAACAC  |
| 4   | P25  | <i>SMN</i> Exon 8  | CTCGAAGCGGCCGCGAGCTCATAAAATTACCA |
| 5   | P31  | <i>SMN</i> Exon 6  | CATGAGTGGCTATCATACTG             |

**Table S4.** Sequences of primers used for RTase extensions in SHAPE structure probing

| No. | Name       | Annealing position within <i>SMN2</i> intron 7 | Sequence (5' to 3')              |
|-----|------------|------------------------------------------------|----------------------------------|
| 1   | Primer #51 | 51-81                                          | AATGTTCAAAAACATTTGTTTTCCACAAACC  |
| 2   | Primer#10  | 88-112                                         | CCTTTCAACTTTCTAACATCTGAAC        |
| 3   | Primer#107 | 107-138                                        | CTTTAATATTGATTGTTTTACATTAACCTTTC |
| 4   | Primer#181 | 181-206                                        | AGTTAAGTATGAGAATTCTAGTAGGG       |
| 5   | Primer#211 | 211-237                                        | GTGAAAGTATGTTTCTTCCACACAACC      |
| 6   | Primer#252 | 252-281                                        | CTACTAGTGATATAAAATGGCATCATATCC   |
| 7   | Primer#315 | 315-340                                        | TACAGTGCAGTATGCCTAGGTTATCC       |
| 8   | Primer#17  | 338-362                                        | GAGCACTTCATATGTCAGAGTGTAC        |
| 9   | Primer#3L  | 411-436                                        | GAGAAATTAGAACCAGAGGCTTGACG       |
| 10  | Primer#414 | 414-442                                        | GCAAATGAGAAATTAGAACCAGAGGCTTG    |
